# Supplementary material for: Different Ultrasound Exposure Times Influence the Physicochemical and Microbial Quality Properties in Probiotic Goat Milk Yogurt
Source: PubMed Central journal article supplement (PMC7587201; doi:10.3390/molecules25204638), 2020-10-12
Supplement: molecules-25-04638-s001.pdf [file molecules-25-04638-s001.pdf]

**Table S1.** Pearson's correlation test between microbial count and physicochemical parameters in goat's milk yogurts stocked at 4 °C.

| Parameter    | <i>S. thermophilus</i>         |        |              | <i>L. bulgaricus</i>          |        |              | <i>L. acidophilus</i> LA-5    |        |              |
|--------------|--------------------------------|--------|--------------|-------------------------------|--------|--------------|-------------------------------|--------|--------------|
|              | Equation                       | R      | p            | Equation                      | R      | p            | Equation                      | R      | p            |
| pH           | -0.056 S <sub>t</sub> + 4.87   | -0.955 | <b>0.010</b> | -0.040 L <sub>b</sub> + 4.59  | -0.964 | <b>0.035</b> | -0.030 L <sub>a</sub> + 4.53  | -0.952 | <b>0.011</b> |
| Lactose      | -0.816 S <sub>t</sub> + 58.41  | -0.664 | 0.336        | -0.517 L <sub>b</sub> + 53.96 | -0.588 | 0.412        | -0.405 L <sub>a</sub> + 53.33 | -0.615 | 0.385        |
| Glucose      | -0.001 S <sub>t</sub> + 0.122  | -0.056 | 0.944        | -0.003 L <sub>b</sub> + 0.126 | -0.166 | 0.834        | -0.002 L <sub>a</sub> + 0.123 | -0.176 | 0.823        |
| Galactose    | 0.032 S <sub>t</sub> + 0.784   | 0.836  | <b>0.022</b> | 0.022 L <sub>b</sub> + 0.949  | 0.797  | <b>0.042</b> | 0.016 L <sub>a</sub> + 0.981  | 0.778  | <b>0.045</b> |
| Citric       | 0.001 S <sub>t</sub> + 0.118   | 0.078  | 0.921        | 0.001 L <sub>b</sub> + 0.119  | 0.156  | 0.844        | 0.001 L <sub>a</sub> + 0.122  | 0.116  | 0.884        |
| Lactic       | 0.0237 S <sub>t</sub> + 1.58   | -0.291 | 0.709        | -0.011 L <sub>b</sub> + 1.43  | -0.191 | 0.809        | -0.010 L <sub>a</sub> + 1.42  | -0.221 | 0.779        |
| Formic       | 0.007 S <sub>t</sub> + 0.354   | 0.929  | <b>0.020</b> | 0.005 L <sub>b</sub> + 0.393  | 0.883  | <b>0.019</b> | 0.004 L <sub>a</sub> + 0.400  | 0.878  | <b>0.020</b> |
| Cadaverin    | -0.205 S <sub>t</sub> + 4.86   | -0.399 | 0.601        | -0.152 L <sub>b</sub> + 3.87  | -0.414 | 0.586        | -0.125 L <sub>a</sub> + 3.71  | -0.453 | 0.547        |
| Putrescine   | -0.05847 S <sub>t</sub> + 3.21 | -0.484 | 0.516        | -0.051 L <sub>b</sub> + 2.96  | -0.588 | 0.412        | -0.037 L <sub>a</sub> + 2.89  | -0.580 | 0.420        |
| Spermidine   | 0.414 S <sub>t</sub> - 1.78    | 0.784  | 0.216        | 0.273 L <sub>b</sub> + 0.412  | 0.724  | 0.276        | 0.211 L <sub>a</sub> + 0.758  | 0.747  | 0.253        |
| Spermine     | 0.064 S <sub>t</sub> + 1.25    | 0.591  | 0.409        | 0.052 L <sub>b</sub> + 1.54   | 0.676  | 0.324        | 0.038 L <sub>a</sub> + 1.62   | 0.654  | 0.346        |
| Tyramine     | 0.594 S <sub>t</sub> + 10.19   | 0.612  | 0.387        | 0.436 L <sub>b</sub> + 13.11  | 0.629  | 0.371        | 0.308 L <sub>a</sub> + 13.82  | 0.593  | 0.407        |
| Total BA     | 1.85 S <sub>t</sub> + 11.36    | 0.940  | <b>0.016</b> | 1.26 L <sub>b</sub> + 20.99   | 0.897  | <b>0.015</b> | 0.943 L <sub>a</sub> + 22.78  | 0.892  | <b>0.016</b> |
| Firmness     | -0.445 S <sub>t</sub> + 38.64  | -0.344 | 0.656        | -0.334 L <sub>b</sub> + 36.49 | -0.362 | 0.638        | -0.278 L <sub>a</sub> + 36.17 | -0.402 | 0.598        |
| Consistency  | -2.30 S <sub>t</sub> + 382.6   | -0.149 | 0.851        | -1.87 L <sub>b</sub> + 372.3  | -0.170 | 0.830        | -1.75 L <sub>a</sub> + 371.5  | -0.212 | 0.788        |
| Cohesiveness | 0.408 S <sub>t</sub> - 9.14    | 0.627  | 0.372        | 0.280 L <sub>b</sub> - 7.03   | 0.602  | 0.398        | 0.222 L <sub>a</sub> - 6.71   | 0.637  | 0.362        |
| K            | -2.97 S <sub>t</sub> + 32.46   | -0.567 | 0.432        | -2.26 L <sub>b</sub> + 18.32  | -0.605 | 0.395        | -1.78 L <sub>a</sub> + 15.62  | -0.635 | 0.365        |
| n            | 0.072 S <sub>t</sub> - 0.264   | 0.532  | 0.468        | 0.055 L <sub>b</sub> + 0.073  | 0.575  | 0.424        | 0.044 L <sub>a</sub> + 0.139  | 0.606  | 0.394        |

K: consistency index; n: flow behavior index; S<sub>t</sub>: *Streptococcus thermophilus*; L<sub>b</sub>: *Lactobacillus bulgaricus*; L<sub>a</sub>: *Lactobacillus acidophilus* LA-5; R: Pearson's correlation coefficient; p: probability value. Values in bold indicate significance of model ( $p < 0.05$ ).

**Table S2.** Optimism-corrected performance estimates through validation by bootstrap approach of significant models for prediction of physicochemical parameters from microbial count in goat's milk yogurt stored at 4 °C during 28 days.

| Specie                     | Parameter   | R <sup>2</sup> <sub>app</sub> | R <sup>2</sup> <sub>boot</sub> | R <sup>2</sup> <sub>orig</sub> | Optimism | R <sup>2</sup> <sub>v</sub> | R <sub>v</sub> |
|----------------------------|-------------|-------------------------------|--------------------------------|--------------------------------|----------|-----------------------------|----------------|
| <i>S. thermophilus</i>     | pH          | 0.912                         | 0.792                          | 0.893                          | -0.100   | 1.012                       | -1.006         |
|                            | Galactose   | 0.699                         | 0.672                          | 0.697                          | -0.025   | 0.724                       | 0.851          |
|                            | Formic acid | 0.864                         | 0.892                          | 0.847                          | 0.045    | 0.819                       | 0.905          |
|                            | Total BA    | 0.884                         | 0.892                          | 0.856                          | 0.036    | 0.848                       | 0.921          |
| <i>L. bulgaricus</i>       | pH          | 0.930                         | 0.751                          | 0.887                          | -0.135   | 1.065                       | -1.032         |
|                            | Galactose   | 0.635                         | 0.646                          | 0.507                          | 0.139    | 0.496                       | 0.704          |
|                            | Formic acid | 0.779                         | 0.827                          | 0.689                          | 0.139    | 0.640                       | 0.800          |
|                            | Total BA    | 0.804                         | 0.830                          | 0.726                          | 0.104    | 0.700                       | 0.837          |
| <i>L. acidophilus</i> LA-5 | pH          | 0.905                         | 0.763                          | 0.857                          | -0.094   | 0.999                       | -0.999         |
|                            | Galactose   | 0.605                         | 0.592                          | 0.596                          | -0.003   | 0.608                       | 0.780          |
|                            | Formic acid | 0.771                         | 0.813                          | 0.743                          | 0.070    | 0.701                       | 0.837          |
|                            | Total BA    | 0.796                         | 0.817                          | 0.785                          | 0.032    | 0.764                       | 0.874          |

BA: biogenic amine; R<sup>2</sup><sub>app</sub>: apparent coefficient of determination; R<sup>2</sup><sub>boot</sub>: bootstrap coefficient of determination; R<sup>2</sup><sub>orig</sub>: original coefficient of determination; R<sup>2</sup><sub>v</sub>: coefficient of determination of the model after validation. R<sub>v</sub>: correlation coefficient of the model after validation
